# Supplementary material for: Long-term pig manure application increases SOC through aggregate protection and Fe-C associations in a subtropical red soil (Udic Ferralsols)
Source: Copernicus journal article supplement (doi:10.5194/soil-11-1095-2025), 2025-12-15
Supplement: Supplementary file 1 [file soil-11-1095-2025-supplement.pdf]

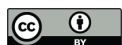

*Supplement of*

**Long-term pig manure application increases SOC through aggregate protection and Fe-C associations in a subtropical red soil (Udic Ferralsols)**

**Hui Rong et al.**

*Correspondence to:* Hu Zhou (zhouhu@cau.edu.cn)

The copyright of individual parts of the supplement might differ from the article licence.

**Calculation of carbon inputs from pig manure:**

Annual C input (Mg C ha<sup>-1</sup>) = (Manure application rate, kg N ha<sup>-1</sup>) / (Manure N content, g kg<sup>-1</sup>) × (Manure C content, g kg<sup>-1</sup>) × 10<sup>-3</sup>

*Example for LM treatment:*

$$(150 \text{ kg N ha}^{-1}) / (36.2 \text{ g N kg}^{-1}) \times 386.5 \text{ g C kg}^{-1} \times 10^{-3} = 1.6 \text{ Mg C ha}^{-1}$$
